# Supplementary material for: Dynamic transcriptome changes during adipose tissue energy expenditure reveal critical roles for long noncoding RNA regulators
Source: PLoS Biol. 2017 Aug 1;15(8):e2002176. doi: 10.1371/journal.pbio.2002176 (PMC5538645; doi:10.1371/journal.pbio.2002176)
Supplement: S11 Data — (XLSX) [file pbio.2002176.s018.xlsx]

## Sheet: Q1_top100_abundant_lncRNA_in_BA
LncID	Locus	WAT_CNT_1	WAT_CNT_2	WAT_BETA_1	WAT_BETA_2	WAT_COLD_1	WAT_COLD_2	WAT_SWIM_1	WAT_SWIM_2	S3_BAT_CNT_1	S3_BAT_CNT_2	S3_BAT_30oC_1	S3_BAT_30oC_2	S5_BAT_CNT_1	S5_BAT_CNT_2	S5_BAT_CNT_3	S5_BAT_Cold_1	S5_BAT_Cold_2	S5_BAT_Cold_3	Mean_of_S5
CUFF.163098	chr19:5795749-5802664	18557.2	26389	28239.3	37218.3	25324.7	67290.7	16727.1	23702.2	15308.7	12525.6	9563.14	9899.87	38952.6	50226.8	49589.6	56389.9	87468.9	67441.6	58344.9
CUFF.163122	chr19:5824707-5845945	22133.2	21263.8	15509.2	14141.6	31214.1	31666.9	15956.5	14608.6	11151.9	10171.9	11594.3	10083.4	9485.6	6509.43	8471.28	22150.3	20842.6	20366.5	14637.6
CUFF.158813 (lncBATE10)	chr18:61470267-61485112	0	0	288.312	229.986	962.588	1679.07	94.5837	66.4346	12785	15536.4	5749.3	6379.09	1414.12	1337.38	1179.45	18437	19571.7	19800.2	10290
CUFF.312975	chr8:108553267-108584753	1680.45	1904.53	6284.3	7282.52	6311.5	10094.3	2582.75	3025.48	10892.8	13554.6	9277.88	11004.8	3254.66	3351.44	3027.47	15802.6	18819.2	14859.9	9852.55
CUFF.54409	chr11:75461371-75466394	2200.17	4166.61	3509.88	5359.01	5144.03	8592.43	2535.4	4076.46	5528.43	6039.13	4617.01	5745.4	2292.54	3079.46	2511.69	7774.42	11755.3	9418.8	6138.7
CUFF.213468	chr3:123507549-123508591	6785.13	12064.7	5429.12	9577.8	4351.6	5002.62	6047.78	9155.92	5413.54	5793.88	6184.42	7991.28	3249.79	4371.67	6594.83	5184.31	7725.99	7709.01	5805.93
CUFF.51934	chr11:62602853-62604790	18282.1	31209.7	14304.4	16319.9	6223.19	3903.22	15412.2	20009.3	6030.25	6570.22	11316.9	13552.8	3880.54	5043.77	7303.98	3582.02	5503.25	4145.57	4909.85
CUFF.233503	chr4:132308639-132310953	7108.6	9511.13	4719.4	6096.08	2984.81	2801.98	6313.35	7455.07	3397.98	3487.65	5284.36	5090.14	1672.62	2470.11	2399.94	3054.67	5750.88	3451.15	3133.23
CUFF.19733	chr1:161034135-161038538	3808.32	12074.3	2589	7773.79	1664.15	4324.29	3476.46	8777.18	4423.59	5756.16	4442.81	6503.91	1133.27	2762.31	2715.78	1429.04	4463.03	4137.54	2773.49
CUFF.997	chr1:9942034-9944171	5237.91	5997.63	5289.59	7303.61	8267.12	8124.43	6129.13	6535.67	11113.3	12530.8	13202.6	16738.1	2769.64	2003.3	2167.04	2895.4	3644.61	2770.95	2708.49
CUFF.155001	chr18:35553418-35557745	1870.69	2119.16	2289.71	2770.37	1873.51	2237.04	2612.83	2676.79	3587.99	4471.13	2753.96	2844.54	1788.55	1659.64	1995.6	3387.2	3504.55	2938.22	2545.63
CUFF.163852	chr19:8723572-8726433	4885.66	4030.54	2943.33	3473.4	1921.75	2137.79	3256.73	2885.12	3088.84	3870.52	4135.83	3906.94	1543.57	1505.52	1458.76	3773.55	3905.21	2741.49	2488.02
CUFF.171207	chr19:56753121-56764025	86.8399	88.708	398.994	463.798	867.542	904.674	83.0894	87.2414	3046.97	2916.69	1181.27	960.807	670.145	744.507	465.554	4465.93	3730.21	4037.62	2352.33
CUFF.55995	chr11:83291695-83294948	291.004	449.257	331.872	542.614	216.807	33.4654	561.038	464.835	275.239	417.733	675.69	312.758	1045.85	902.997	1147.89	2785.37	4964.49	3091.8	2323.07
CUFF.288764	chr7:73544130-73557982	1684.13	3320	1366.98	2215.02	1625.48	2373.44	1597.72	2314.11	4335.39	3390.63	3803.81	4916.34	1498.37	1764.69	1700.72	2253.07	2738.51	3196.76	2192.02
CUFF.269518	chr6:86510246-86516411	502.578	391.74	1074.45	1076.6	929.733	1211.59	811.747	882.624	1891.72	1789.81	2258.17	2421.11	2249.87	1762.82	2089.71	2616.22	2576.16	1536.49	2138.55
CUFF.57649	chr11:94133455-94155813	364.733	496.864	557.735	1115.72	133.775	427.476	605.943	913.603	1231.46	1190.65	799.983	901.838	856.777	1691.58	2130.97	1434.24	2832.09	3815.04	2126.78
CUFF.175207	chr2:26637172-26640259	2200.11	3000.45	2178.23	3283.16	1820.27	2319.36	3465.76	4678.47	2263.37	2930.31	2104.95	2575.69	1751.05	2842.92	2479.01	1680.62	2418.03	1150.17	2053.63
CUFF.302303	chr8:24502486-24512848	62.5024	110.268	919.355	1198.25	1345.19	2786.48	371.636	489.928	3886.47	4475.25	4929.11	7446.8	2176.03	2516.1	3261.55	1171.31	1685.89	1033.9	1974.13
CUFF.125490	chr16:13447948-13479063	119.624	167.909	761.541	843.746	1451.6	2607.05	380.834	438.418	2913.7	3613.87	1497.56	1364.8	1195.35	1339.11	898.33	2734.84	2832.49	2443.31	1907.24
CUFF.160530	chr18:75358643-75365014	628.182	674.062	562.737	501.234	978.09	1324.46	632.187	696.332	657.06	722.778	734.607	861.252	2079.63	1756.61	1892.3	1846.86	1532.17	1835.35	1823.82
CUFF.221486	chr4:43046284-43053299	603.963	1422.83	1767.61	2447.89	863.162	912.096	1749.39	1800.17	1220.25	1810.54	1716.1	2520.19	1168.34	1797.99	1919.95	1795.03	2586.12	1571.65	1806.51
CUFF.160414	chr18:74777945-74778796	171.844	457.184	844.663	877.513	202.579	733.028	229.052	547.266	1270.01	1261.66	910.206	644.998	1054.05	1939.22	2259.92	1857.21	1886.14	1660.26	1776.13
CUFF.171457	chr19:58818756-58821868	79.4401	40.9949	44.8967	49.5122	2970.4	3863.88	177.49	70.7013	219.755	757.378	684.113	490.521	1849.66	1435.6	2167.97	1925.56	1081.74	1392.94	1642.24
CUFF.62737	chr11:117076328-117078948	3071.81	5338.21	2565.53	4458.72	1885.18	2249.13	3889.92	5561.61	4414.86	4301.43	3080.22	2889.71	1312.4	1578.02	1992.33	886.584	2201.88	1347.37	1553.1
CUFF.78391	chr12:109654281-109658128	2741.29	1845.01	1449.22	1136.16	1582.99	1633.79	1154.67	737.72	5477.92	2916.69	3560.4	4127.76	1121.59	1404.71	2078.29	2032.31	1115.85	1253.18	1500.99
CUFF.192938	chr2:156432790-156433604	181.758	0	1144.09	716.613	1731.91	2290.96	266.815	401.977	1142.59	1506.03	1814.45	1449.5	1012.2	1752.5	788.222	1356.33	988.696	2630.22	1421.36
CUFF.299734	chr8:3669463-3672933	2010.53	2584.29	2997.57	4059.56	1733.06	2846.66	3659.15	4638.89	4637.15	4804.72	3497.84	4118.57	793.499	1148.81	1012.81	1391.32	2163.33	1966.07	1412.64
CUFF.58250	chr11:95788739-95789972	94.0709	31.3431	810.256	625.55	940.058	682.801	119.272	108.397	1568.85	1279.37	309.751	423.832	364.509	552.047	519.251	2361.68	2301.19	1960.58	1343.21
CUFF.92135	chr13:94645916-94647337	0	0	80.6386	0	170.217	354.616	66.9648	23.5621	723.341	812.108	961.543	1341.91	1992.77	1661.95	2316.51	570.835	525.785	931.051	1333.15
CUFF.140021	chr17:24528234-24528737	5266.67	3894.37	4247.72	4635.73	3970.37	3074.91	4658.65	5048.4	3610.93	2994.15	2669.38	3554.06	162.774	1404.9	1360.8	1638.18	1991.85	1380.29	1323.13
CUFF.330700	chr9:88521065-88522874	3280.31	3672.52	3264.84	2721.7	6811.68	5010.89	3133.54	3516.39	2293.74	2474.22	2141.88	2030.85	1286.26	1217.34	1249.93	1296.11	1621.41	1139.42	1301.74
CUFF.301982	chr8:22480587-22483329	1837.8	1582.77	1273.34	1042.85	898.741	621.379	1499.78	1471.28	1732.07	1665.76	1225.73	1176.14	1735.04	1188.88	1404.19	1263.45	1135.65	1060.34	1297.92
CUFF.238003	chr4:154637548-154644919	440.199	578.754	510.605	654.717	491.604	684.838	433.24	494.534	1653.75	1827.95	1701.18	1881.68	1144.16	1289.02	985.568	1396.18	1048.03	1472.69	1222.61
CUFF.300833	chr8:13200701-13207710	80.2626	75.0517	296.423	467.312	869.661	1751.14	132.75	292.1	1423.41	1706.11	885.996	848.709	1158.79	828.365	943.494	1272.08	1307.11	1650.99	1193.47
CUFF.306232	chr8:57488024-57490498	544.762	579.699	1283.58	768.838	1362.52	609.617	1223.6	1033.71	1011.47	1564.28	1086.81	813.815	1396.19	902.079	943.639	1050.43	1893.52	915.134	1183.5
CUFF.43621	chr11:6525591-6528780	2258.49	3582.32	1644.13	1985.43	502.094	344.94	1140.55	1429.55	937.341	1711.65	1147.52	1488.85	421.175	472.417	537.384	1507.47	2060.9	2079.87	1179.87
CUFF.269065	chr6:84433602-84434522	0	0	0	143.041	442.864	537.902	213.601	0	288.781	422.062	196.832	0	0	0	206.793	2183.12	1038.19	3582.38	1168.41
CUFF.254064	chr5:123133726-123140725	2801.9	3391.77	1897.09	2112.89	2062.85	2325.85	2380.62	2558.02	2021.36	1904.24	1297.89	1128.01	1922.04	1529.31	1582.03	645.549	646.214	618.139	1157.21
CUFF.100725	chr14:45563711-45586424	344.928	509.89	233.752	729.783	340.443	412.258	1194.65	1424.68	1603.19	1874.66	5634.83	7200.35	1904.2	2251.26	1812.97	280.357	338.335	231.985	1136.52
CUFF.316786	chr8:126978046-126979499	1631.27	1439.26	6250.94	9337.56	1572.57	4388.82	3400.47	5303.46	2875.82	3086.03	2002.86	3782.86	782.955	931.716	898.54	762.69	1558.16	1831.24	1127.55
CUFF.257527	chr5:143329296-143332673	1783.29	2061.27	2688.51	2408.48	1667.65	2308.26	2562	1930.53	1671.39	1861.32	3323.97	3586.86	1366.5	1041.32	947.745	421.812	1963.48	990.671	1121.92
CUFF.51192	chr11:59921521-59921880	0	0	0	0	0	0	0	0	1074.43	2005.09	756.826	0	1660.81	628.837	664.764	2435.34	556.274	549.717	1082.62
CUFF.32732	chr10:63055654-63057454	400.071	152.89	230.313	363.845	0	0	208.49	538.629	996.718	1594.93	1228.83	1117.95	1102.73	2083.4	2093.34	893.206	291.82	0	1077.42
CUFF.179796	chr2:60206647-60209836	1220	2638.71	2164.82	3755.73	1723.28	3834.98	1898.53	2715.09	2402.38	1999.2	1629.46	2967.7	764.059	881.821	1043.72	740.764	761.945	2202.21	1065.75
CUFF.344746	chrX:95960480-95968036	181.384	272.807	250.722	326.267	190.652	484.489	931.037	1067.59	1839.8	1675.69	1900.27	1727.34	1259.91	1497.13	1649.54	624.957	723.053	614.222	1061.47
CUFF.60605	chr11:104558866-104565872	21.108	0	79.8023	45.397	195.106	385.351	70.0091	220.052	377.966	462.29	103.174	146.929	134.065	122.103	145.474	1106.98	2724.5	2047.45	1046.76
CUFF.142755	chr17:33908358-33909178	2128.83	3611.42	1608.19	1943.65	1168.39	1360.73	2790.69	4200.47	1621.9	2078.19	3938.22	4599.52	1680.21	932.276	2130.44	381.971	749.849	389.744	1044.08
CUFF.156433	chr18:42274386-42275196	3387.03	2589.93	2381.23	3213.79	3089.11	1943.27	4860.26	2538.36	3480.86	2496.72	2803.41	2393.97	1116.89	561.947	419.121	522.819	1648.71	1869.87	1023.23
CUFF.154608	chr18:33794885-33795981	2623.25	4383.1	1858.32	3284.98	1090.69	914.382	2676.75	4765.48	2527.21	4359.67	3955.17	4575.32	474.718	1012.03	1352.63	852.854	1353.84	778.541	970.769
CUFF.69169	chr12:37095794-37106743	265.832	175.94	292.967	147.379	264.214	198.465	331.255	217.428	503.577	755.673	865.23	506.94	956.487	1341.22	377.833	1109.69	440.01	1581.57	967.802
CUFF.203548	chr3:52516898-52550251	318.143	347.55	1046.67	1340.56	691.559	1343.48	291.012	546.375	1832.59	2284.58	1034.99	1357.73	432.333	341.721	453.162	1520.82	1562.34	1475.98	964.393
CUFF.93179	chr13:101545044-101566381	14.3074	21.9923	0	53.2803	176.249	52.4419	13.8157	10.8484	185.173	138.945	190.112	245.068	585.653	642.285	390.721	1759.14	991.117	1035.38	900.716
CUFF.16813	chr1:136379808-136401153	66.6958	132.914	588.492	806.583	534.585	1302.26	178.877	200.955	780.108	1052.04	537.816	560.999	704.57	1033.72	1002.13	615.396	1058.59	937.479	891.981
CUFF.278938	chr7:3423273-3423440	325.469	527.569	0	0	0	0	0	572.874	0	0	1354.21	0	0	2007.24	0	0	3284.87	0	882.018
CUFF.78399	chr12:109649146-109651938	1267.95	783.877	582.698	729.963	1444.56	1106.66	311.512	568.047	2146.38	2737.04	2391.23	2063.18	783.15	1123.07	700.173	800.938	995.862	695.094	849.715
CUFF.143139	chr17:34950238-34951309	1550.33	1096.99	799.376	942.225	1212.36	744.538	1245.32	1225.43	1102.91	1325.08	945.811	1263.43	331.138	535.153	527.21	1791.54	924.891	972.281	847.035
CUFF.32321	chr10:61494823-61500424	18.0186	13.9941	523.132	811.149	1659.3	4609.68	268.088	379.226	1137.02	1469.28	564.309	686.959	375.746	424.679	484.247	888.383	1388.26	1436.92	833.039
CUFF.4721	chr1:43932251-43933899	802.017	1361.79	1074.84	2378.97	1286.62	941.66	1811.68	2261.02	1732.88	1349.9	2581.22	1519.12	415.829	521.847	1114.84	635.822	557.983	1471.21	786.255
CUFF.52176	chr11:64079336-64083256	1063.42	1510.95	906.615	1274.64	765.932	1404.06	768.279	1002.38	2198.72	2271.26	1727.31	1750.3	353.386	546.789	465.472	732.447	1533.73	1066.23	783.009
CUFF.196050	chr2:173140428-173146851	141.717	168.423	373.535	584.712	113.474	115.792	138.116	190.264	636.223	771.741	124.862	214.641	33.7895	98.0168	110.606	1315.76	1252.78	1778.78	764.955
CUFF.260971	chr6:21851838-21858877	402.6	455.425	437	520.583	348.664	357.247	342.892	350.934	1147.16	1141.98	1351.82	1075.96	1040.27	953.973	891.47	556.716	520.38	581.605	757.402
CUFF.295543	chr7:121768513-121777376	82.534	116.189	259.624	550.255	224.045	352.134	98.2539	281.318	439.249	519.684	161.974	141.805	66.3008	99.0923	38.1633	1133.22	1425.69	1744.89	751.226
CUFF.213973	chr3:129527515-129532031	51.1962	59.3805	1272.61	1895.51	2500.4	4112.76	1374.4	2298.84	1833.15	1932.24	1686.76	1536.36	849.177	1269.93	1075.34	634.412	383.885	183.34	732.681
CUFF.310025	chr8:84200887-84209606	1520.3	2176.81	929.536	1390.21	943.076	889.797	1249.45	1427.61	1555.69	1614.35	1589.19	1864.62	829.879	693.542	572.575	762.396	850.577	676.143	730.852
CUFF.338320	chrX:20962090-20987328	804.568	594.573	1028.12	644.551	1137.58	1010.23	838.303	612.568	2111.55	1431.34	1508.22	1237.87	651.489	486.317	577.814	917.404	789.228	886.176	718.071
CUFF.176548	chr2:31150593-31152476	530.589	828.861	1528.64	1566.26	1023.46	1476.02	1095.17	1526.45	2156.93	1987.92	1555.36	1837.32	543.404	571.517	466.675	643.106	1162.37	851.588	706.443
CUFF.283982	chr7:34659775-34663016	129.66	90.9075	539.021	509.991	207.621	505.145	248.173	216.87	916.222	767.538	655.602	521.191	244.142	505.138	350.316	1110.91	1175.88	801.955	698.057
CUFF.323981	chr9:50488780-50507974	11.068	0	174.002	291.183	515.616	1198.76	80.8168	92.3667	1192.97	1089.8	1280.92	1733.73	1215.56	1037.27	813.054	258.746	445.712	385.085	692.571
CUFF.127960	chr16:24185852-24206656	185.154	138.779	871.58	1172.35	1082.45	1567.92	374.876	908.014	1009.66	1223.92	638.8	877.51	277.022	306.954	175.135	473.613	1311.64	1597.75	690.352
CUFF.197086	chr2:179976790-179981378	269.256	408.8	500.364	699.925	915.773	1298.5	423.562	486.162	1015.71	1021.01	719.013	548.867	544.725	555.19	577.807	703.009	796.765	950.814	688.052
CUFF.273080	chr6:115505499-115540277	171.844	144.992	344.997	601.764	678.257	573.373	407.114	383.12	903.724	932.704	390.58	393.75	358.921	540.291	365.063	1052.01	645.842	1073.75	672.646
CUFF.116053	chr15:59827022-59831619	10.1763	18.9928	94.1642	69.1884	62.0534	112.929	17.8106	24.9182	230.038	246.159	41.3741	78.8612	0	23.9332	25.987	1342.04	988.022	1548.64	654.77
CUFF.281332	chr7:19749922-19754950	235.37	347.409	477.65	628.054	162.702	440.606	588.334	699.971	676.546	834.558	1045.49	849.79	447.055	842.788	938.49	461.447	519.386	665.904	645.845
CUFF.316136	chr8:123754325-123772468	97.9129	83.9137	275.948	133.112	844.129	439.5	157.77	279.903	863.147	693.416	607.117	323.398	752.329	892.845	516.474	439.285	742.482	512.847	642.71
CUFF.168127	chr19:37254618-37264431	1371.2	1479.81	1227.88	1280.64	1393.23	2033.66	2027.2	1915.39	587.939	587.393	989.863	981.947	722.046	674.27	650.997	642.078	524.518	543.88	626.298
CUFF.58808	chr11:97644248-97660367	347.473	403.677	209.89	289.337	316.089	263.362	256.578	309.347	381.937	442.565	324.261	297.266	602.463	573.432	479.358	581.919	565.189	778.863	596.871
CUFF.129407	chr16:33379845-33380719	429.593	599.277	556.248	983.431	1572.3	2104.55	462.015	674.536	923.989	1087.69	689.32	731.172	448.809	246.428	427.468	702.36	1088.37	614.656	588.015
CUFF.18272	chr1:151748946-151755008	1026.13	1185.91	1721	1816.84	1452.07	1514.08	2013.38	2082.84	1655.13	1273.46	2248.73	2261.23	943.726	1173.94	763.482	294.491	0	312.66	581.383
CUFF.51179	chr11:59737603-59741115	423.111	396.265	295.901	316.537	904.841	879.686	229.436	153.932	1088.7	1104.9	387.651	306.112	476.983	510.559	363.22	849.307	497.421	779.191	579.447
CUFF.207236	chr3:85544533-85573923	337.724	347	230.646	414.536	483.668	400.934	479.521	529.542	1309.97	1110.06	902.172	1435.73	219.453	650.992	684.902	355.787	504.509	1000.75	569.399
CUFF.250499	chr5:104538406-104554137	569.244	640.107	562.85	454.334	674.797	960.413	616.143	442.877	956.906	869.543	563.906	456.168	294.388	353.202	366.472	972.639	698.517	702.176	564.566
CUFF.196263	chr2:174321504-174327381	337.396	404.704	317.831	370.491	366.313	585.745	406.383	512.873	1013.07	1217.72	765.392	856.56	405.44	498.366	493.22	488.404	736.719	722.392	557.423
CUFF.194802	chr2:167189123-167192588	240.072	320.473	360.326	817.545	1576.78	2424.14	619.173	661.837	931.608	610.215	829.403	1113.02	692.601	946.994	805.564	247.035	196.529	353.248	540.328
CUFF.268624	chr6:82877895-82884264	14.4651	7.09591	801.195	696.782	3589.27	7262.44	212.025	244.25	1265.43	1358.04	303.001	355.723	369.211	589.333	354.68	548.263	504.088	677.263	507.14
CUFF.273480	chr6:117878840-117888302	487.754	865.921	833.485	1148.1	469.21	773.439	1179.66	1778.33	1520.64	1224	1605.69	1771.69	467.09	757.169	904.101	330.586	222.338	311.589	498.812
CUFF.326271	chr9:61608272-61612274	24.9424	12.1434	313.115	486.203	172.485	285.712	68.6146	61.7552	838.077	739.094	154.821	214.989	222.652	376.295	168.667	421.031	906.501	874.314	494.91
CUFF.212466	chr3:116172056-116180657	0	0	527.617	1000.41	2540.91	1721.74	0	0	373.452	367.327	0	0	1240.09	620.624	0	0	0	1078.86	489.929
CUFF.63908	chr11:120831078-120834474	35.6098	190.517	166.853	434.546	390.436	904.17	302.008	984.91	760.737	938.571	440.161	613.051	356.737	695.848	318.21	253.083	727.917	567.411	486.534
CUFF.300838	chr8:13200701-13207710	10.805	27.4112	54.4267	120.847	126.436	405.837	43.0275	54.8128	270.575	669.167	176.149	272.963	260.999	437.716	393.235	304.753	731.071	781.403	484.863
CUFF.181625	chr2:73584837-73595568	1395.75	1196.26	1538.61	1507.85	2319.67	2741.26	1392.99	1575.52	1322.13	1062.4	1744.48	1587.22	892.513	837.537	640.529	377.343	0	116.351	477.379
CUFF.324882	chr9:55319589-55326816	53.5681	399.562	119.264	273.068	43.682	0	106.084	285.659	492.231	494.135	905.403	757.937	171.615	812.331	603.091	270.053	409.097	591.621	476.301
CUFF.262288	chr6:31366944-31395747	0	20.3451	167.909	196.588	327.442	233.332	163.968	120.809	449.112	450.851	370.631	796.223	535.193	532.935	609.765	442.654	253.57	483.034	476.192
CUFF.98731	chr14:28303117-28308783	301.485	294.504	975.29	749.439	4791.1	5954.71	408.527	251.709	2037.67	1564.99	583.27	526.617	227.583	122.375	141.491	923.754	675.315	752.615	473.856
CUFF.74204	chr12:80120455-80132892	1192.8	1482.58	691.801	773.44	565.861	791.599	713.636	737.454	763.054	589.518	454.311	346.805	449.155	392.53	587.998	441.757	513.329	435.093	469.977
CUFF.82292	chr13:23427971-23431615	212.227	283.702	254.427	213.026	191.652	449.899	190.701	147.115	741.734	691.208	273.786	264.924	421.248	433.161	398.285	444.419	702.692	412.134	468.656
CUFF.321650	chr9:35298961-35307659	66.523	337.388	455.449	840.776	813.152	1535.79	368.452	383.011	689.025	669.167	718.571	979.041	286.361	259.45	385.987	495.681	382.433	937.819	457.955
CUFF.249168	chr5:93221859-93225719	247.14	155.032	632.842	414.311	0	0	273.283	156.108	351.757	296.168	0	425.83	0	481.314	332.956	577.008	761.658	577.011	454.991
CUFF.185559	chr2:106642948-106650446	13.0041	75.7006	87.8764	52.0632	249.506	233.656	15.9986	121.387	578.786	743.179	881.323	704.887	486.421	522.777	594.832	561.845	261.88	274.146	450.317
CUFF.258440	chr5:149006897-149013601	436.294	621.926	466.569	598.903	526.887	941.658	398.943	439.999	117.284	294.224	257.516	451.185	835.772	759.478	716.521	72.1434	139.503	147.792	445.202
